# Supplementary material for: Hydroxychloroquine for the treatment of severe respiratory infection by COVID-19: A randomized controlled trial
Source: PubMed Central journal article supplement (PMC8478184; doi:10.1371/journal.pone.0257238), 2021-09-28
Supplement: pone.0257238.s005.pdf [file pone.0257238.s005.pdf]

**HYDROXYCHLOROQUINE FOR THE TREATMENT OF SEVERE  
RESPIRATORY INFECTION BY COVID-19: A RANDOMIZED CONTROLLED  
TRIAL, CONSORT GUIDELINES**

| <b>Item</b>        | <b>Description</b>                                                                                          | <b>Reported on-line number</b> |
|--------------------|-------------------------------------------------------------------------------------------------------------|--------------------------------|
| Title              | Identification of the study as randomized                                                                   | 2                              |
| Authors *          | Contact details for the corresponding author                                                                | Front page                     |
| Trial design       | Description of the trial design (e.g. parallel, cluster, non-inferiority)                                   | Methods                        |
| Methods            |                                                                                                             |                                |
| Participants       | Eligibility criteria for participants and the settings where the data were collected                        | Methods                        |
| Interventions      | Interventions intended for each group                                                                       | Methods                        |
| Objective          | Specific objective or hypothesis                                                                            | Introduction                   |
| Outcome            | Clearly defined primary outcome for this report                                                             | Methods                        |
| Randomization      | How participants were allocated to interventions                                                            | Methods                        |
| Blinding (masking) | Whether or not participants, care givers, and those assessing the outcomes were blinded to group assignment | Methods                        |
| Results            |                                                                                                             |                                |
| Numbers randomized | Number of participants randomized to each group                                                             | Results, flow chart            |
| Recruitment        | Trial status                                                                                                | Results, flow chart            |
| Numbers analyzed   | Number of participants analyzed in each group                                                               | Flow chart                     |
| Outcome            | For the primary outcome, a result for each group and the estimated effect size and its precision            | Results                        |
| Harms              | Important adverse events or side effects                                                                    | Results, Table                 |
| Conclusions        | General interpretation of the results                                                                       | Yes                            |
| Trial registration | Registration number and name of trial register                                                              | Yes                            |
| Funding            | Source of funding                                                                                           | Acknowledgments                |

*\*This item is specific to conference abstracts*
